# Supplementary material
Source: PubMed Central journal article supplement (PMC4693987)
Supplement: IAI.00822-15_zii999091538so1.pdf [file IAI.00822-15_zii999091538so1.pdf]

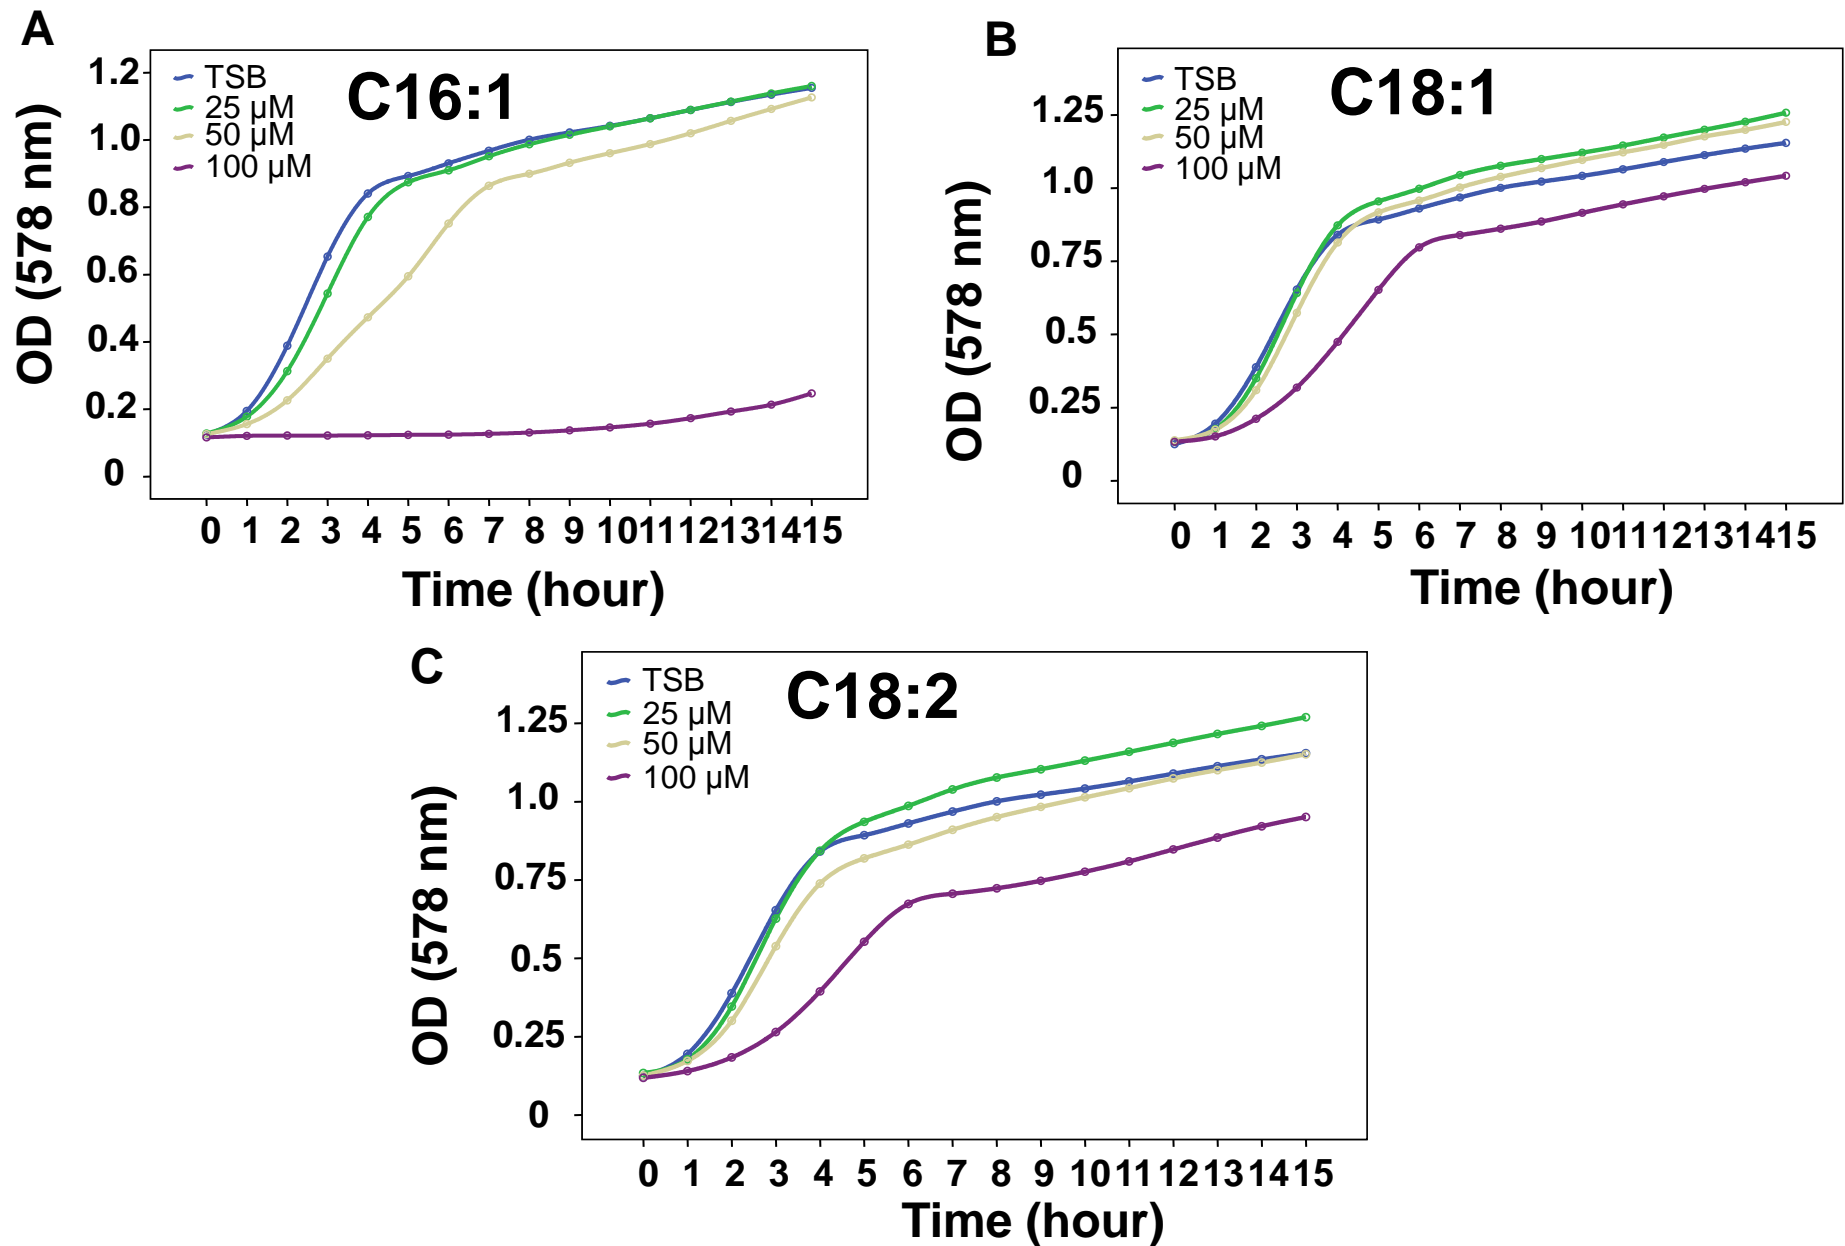

**Figure S1.** Growth curves of *S. aureus* USA300 JE2 in TSB medium with different amount (0, 25, 50 and 100  $\mu$ M) of UFFAs. The strains were cultivated for 15 hours in 96 well plate using Tecan reader to measurement the OD<sub>578nm</sub>. (A) C16:1, (B) C18:1, (C) C18:2.

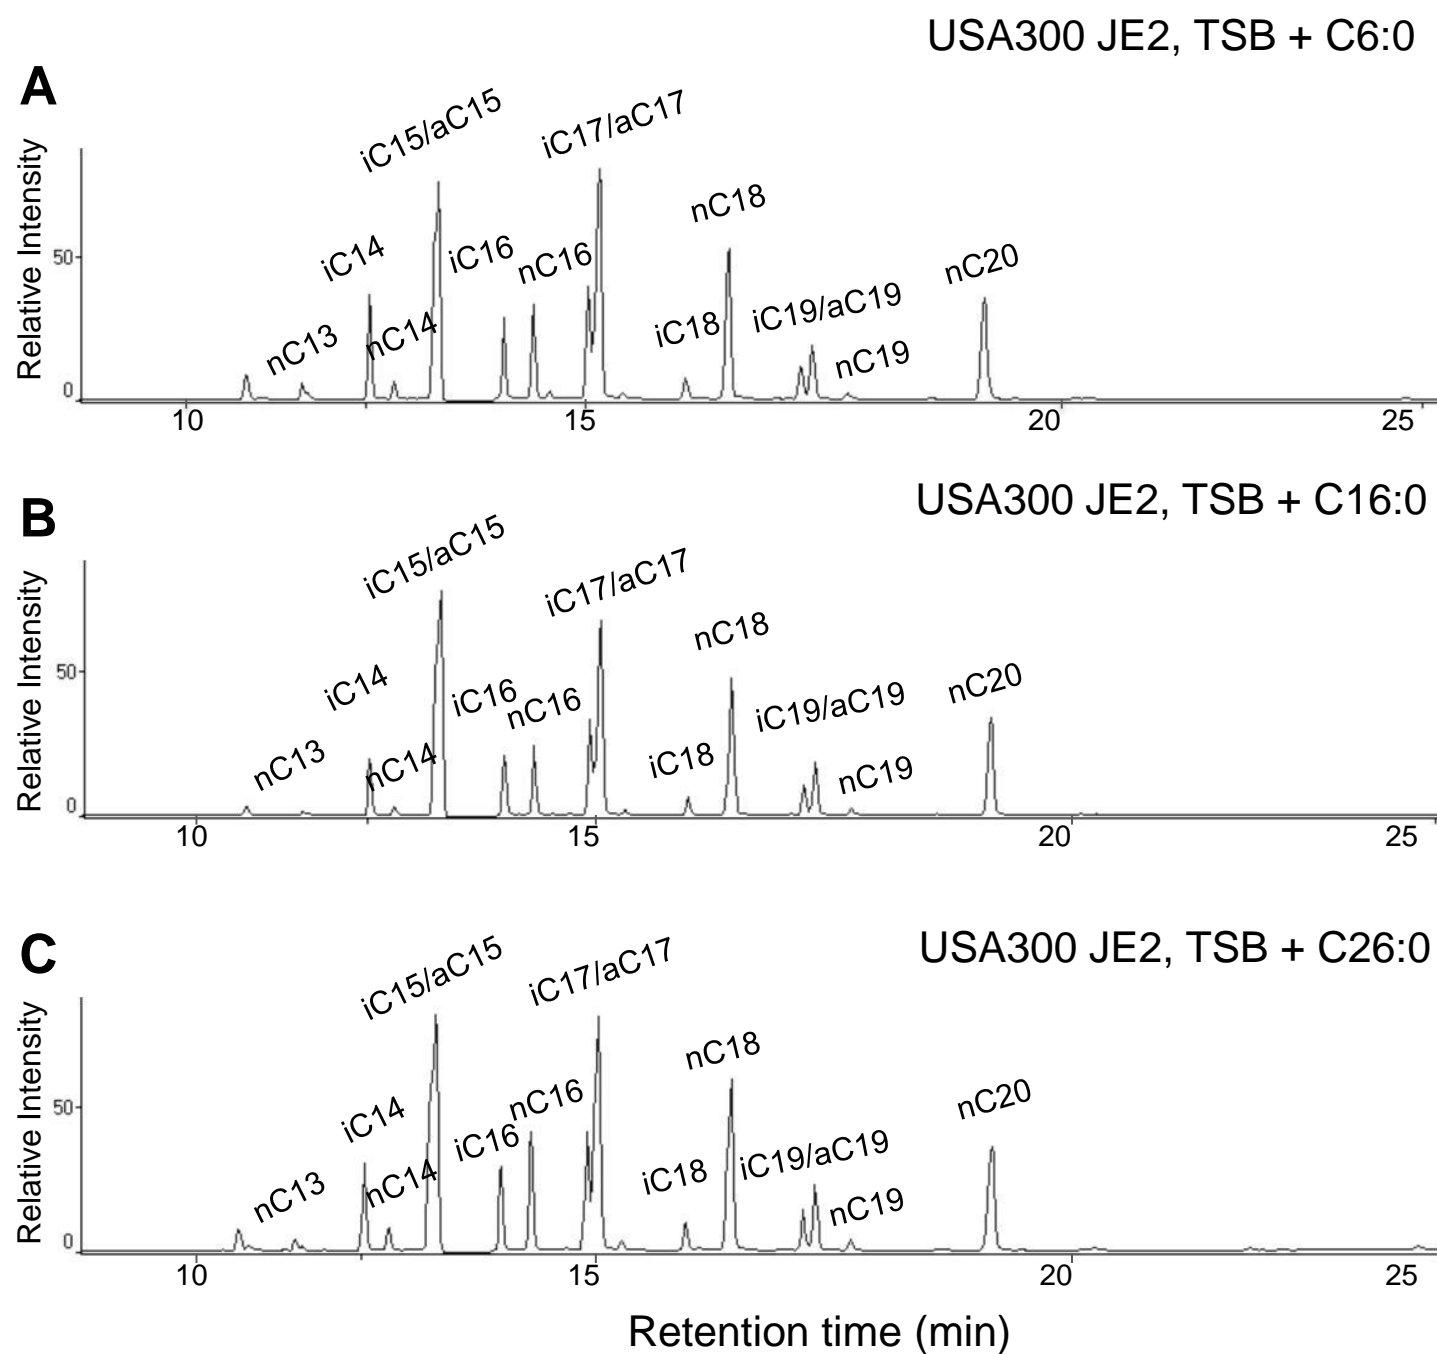

**Figure S2.** GC analysis of the fatty acids isolated from total lipid extraction of *S. aureus* USA300 JE2. (A) in TSB medium with 50 $\mu$ M C6:0, (B) TSB medium with 50  $\mu$ M C16:0, (C) TSB medium with 50  $\mu$ M C26:0.

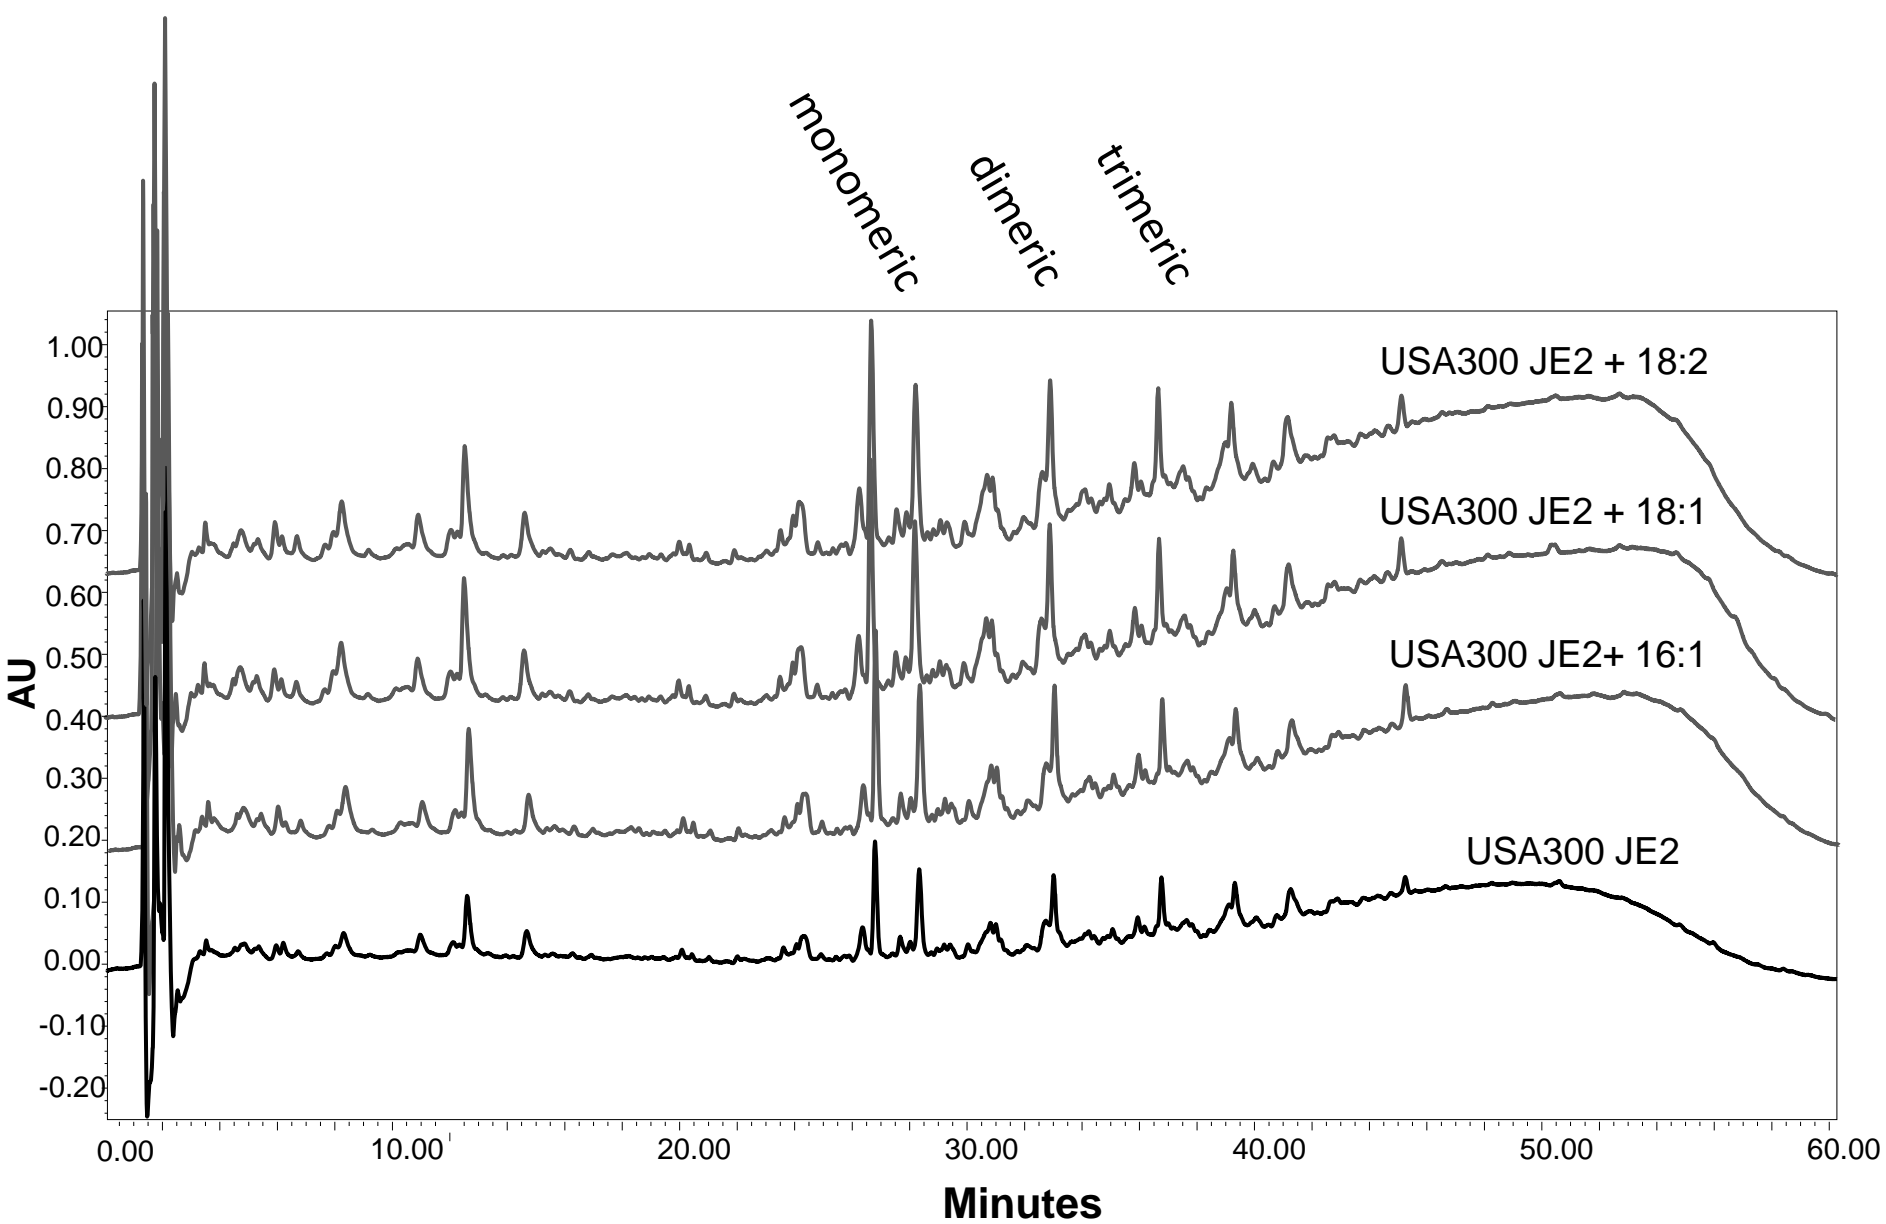

**Figure S3.** Analysis of polymeric peptidoglycan by HPLC. Shown is the pattern for muramidase-digested peptidoglycan from USA300 JE2 overnight culture in TSB and TSB with each 50  $\mu$ M C16:1, C18:1, and C18:2.

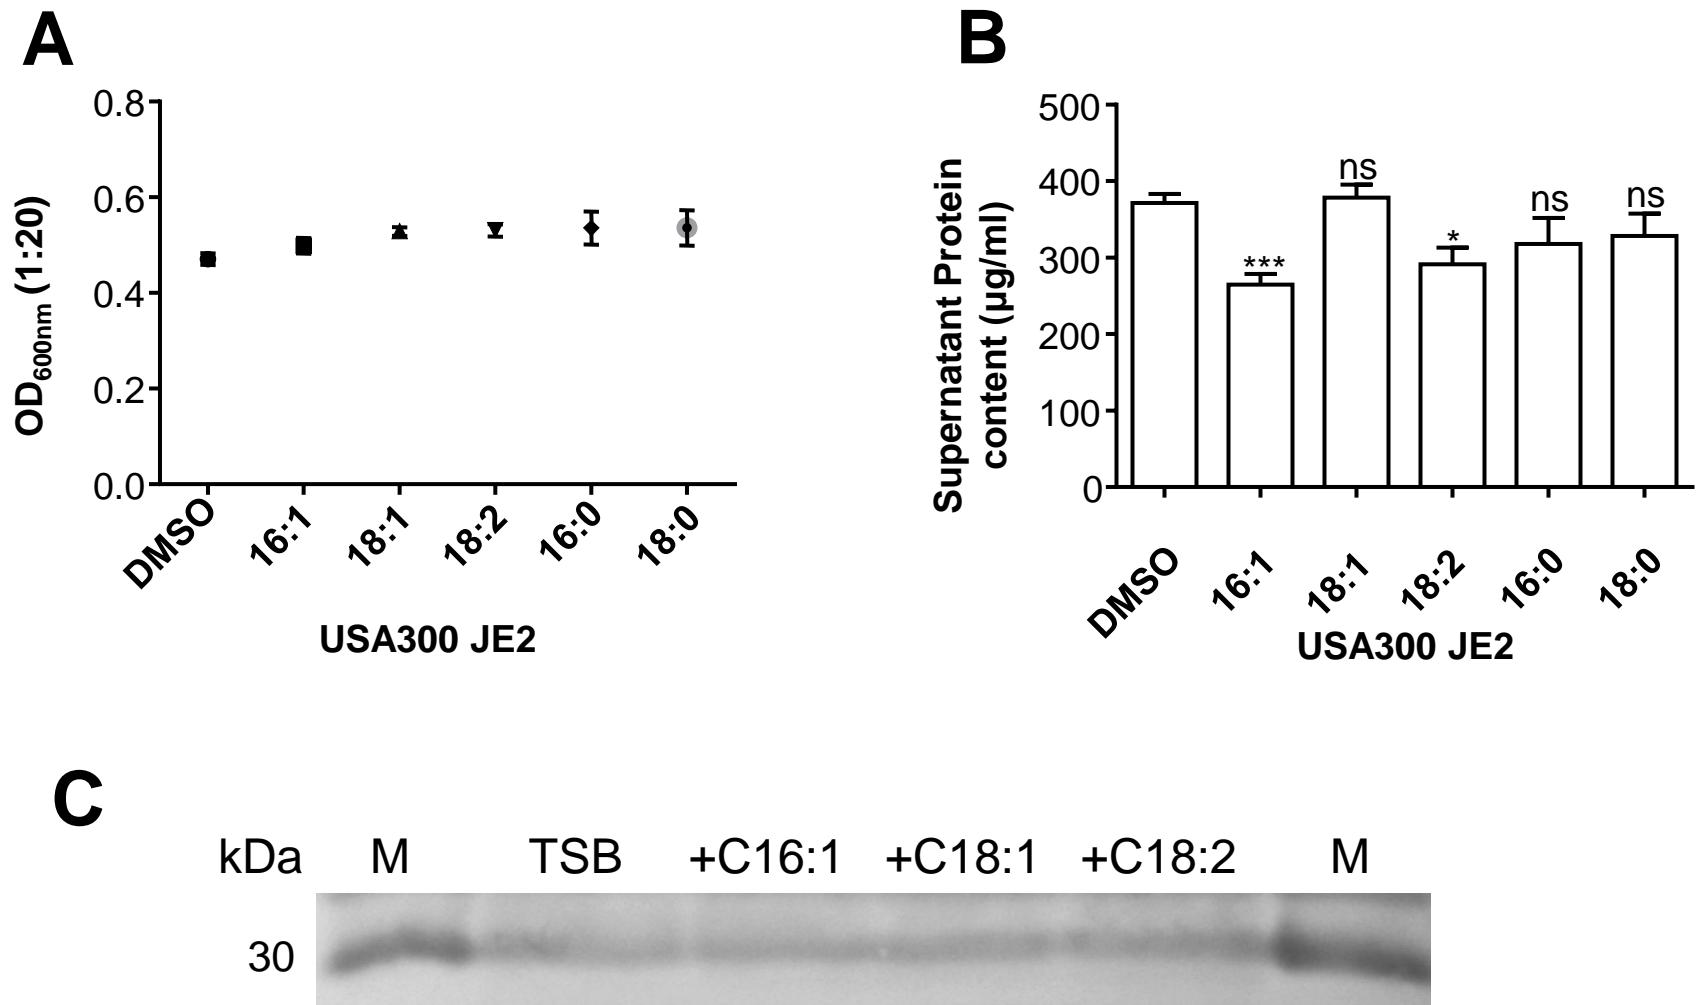

**Figure S4.** Saturated and unsaturated FAs did not significantly influence growth, protein excretion and expression of lipoprotein Lp11 in USA300 JE2. **(A)** OD<sub>600</sub> values (1:20 diluted) of 17 h cultures cultivated in TSB supplemented with DMSO (negative control) or various FAs (50µM). **(B)** Comparison of the protein content (Bradford assay) in the supernatant of USA300 JE2 cultivated in TSB supplemented with DMSO (negative control) or various FAs (50µM). **(C)** Western blots with antiLp11-his present in total protein extract of an overnight culture of USA300 JE2 fed without and with 50 µM C16:1, C18:1 and C18:2. The experiments of A and B were performed at least 3 times. Data represent Mean+/-SEM. Statistical significances were calculated by using unpaired Student's t-tests: not significant (ns) P>0.05, \* P<0.05, \*\*\* P <0.001.
